# Supplementary material for: Controlling Eutrophication of Aquaculture Production Water Using Biochar: Correlation of Molecular Composition with Adsorption Characteristics as Revealed by FT-ICR Mass Spectrometry
Source: MDPI journal article supplement (doi:10.3390/pr11102883), 2023-09-30
Supplement: s1 [file s1]

# **Controlling Eutrophication of Aquaculture Production Water Using Biochar: Correlation of Molecular Composition with Adsorption Characteristics as Revealed by FT-ICR Mass Spectrometry**

**William F. Rance Bare <sup>1</sup>, Ethan Struhs <sup>2</sup>, Amin Mirkouei <sup>1,3,\*</sup>, Kenneth Overturf <sup>4</sup>,  
Martha L. Chacón-Patiño <sup>5,6</sup>, Amy M. Mckenna <sup>4,7</sup>, Huan Chen <sup>5</sup> and Krishnan S. Raja <sup>3</sup>**

<sup>1</sup>Department of Biological Engineering, University of Idaho, Idaho Falls, ID 83402, USA

<sup>2</sup>Department of Mechanical Engineering, University of Idaho, Idaho Falls, ID 83402, USA

<sup>3</sup>Department of Nuclear Engineering and Industrial Management, University of Idaho, Idaho Falls, ID 83402, USA; ksraja@uidaho.edu

<sup>4</sup>Agricultural Research Service, United States Department of Agriculture, Hagerman, ID 83332, USA; mckenna@magnet.fsu.edu (A.M.M.)

<sup>5</sup>National High Magnetic Field Laboratory, Ion Cyclotron Resonance Facility, Florida State University, Tallahassee, FL 32310, USA

<sup>6</sup>International Joint Laboratory for Complex Matrices Molecular Characterization, iC2MC, TRTG, 76700 Harfleur, France

<sup>7</sup>Department of Soil and Crop Sciences, Colorado State University, Fort Collins, CO 80523, USA

\* Correspondence: amirkouei@uidaho.edu

## Supplementary Materials

**Table S1. Biochar results before and after water treatment**

| Biochar Sample | Mass in Filter Bag (gram) | Residence Time (hour) | Water Flow Rate (gal/min) | Nitrate-N + Nitrite-N (µg/g) | Nitrogen-Ammonia (µg/g) | Total Phosphorus (µg/g) | pH  |
|----------------|---------------------------|-----------------------|---------------------------|------------------------------|-------------------------|-------------------------|-----|
| Untreated IB   | -                         | -                     | -                         | 1.0                          | < 0.72                  | 500                     | 7.8 |
| IB 1           | 300                       | 0.5                   | 2                         | 0.96                         | < 0.72                  | 310                     | 7.2 |
| IB 2           | 300                       | 0.5                   | 2                         | 1.3                          | 1.1                     | 350                     | 7.8 |
| IB 3           | 300                       | 0.5                   | 2                         | 1.4                          | 0.73                    | 200                     | 7.4 |
| IB 1.1         | 450                       | 12                    | 1-2                       | 2.1                          | 0.87                    | 380                     | 8.3 |
| IB 1.2         | 450                       | 12                    | 1-2                       | 1.4                          | 0.76                    | 160                     | 7.8 |
| IB 1.3         | 450                       | 12                    | 1-2                       | 20                           | 0.90                    | 180                     | 8.4 |
| IB 2.1         | 450                       | 24                    | 1-2                       | 60                           | 1.6                     | 350                     | 7.8 |
| IB 2.2         | 450                       | 24                    | 1-2                       | 2.4                          | 1.4                     | 400                     | 7.5 |
| IB 2.3         | 450                       | 24                    | 1-2                       | 1.6                          | 2.8                     | 400                     | 7.6 |
| IB 3.1         | 450                       | 48                    | 1-2                       | 140                          | 15                      | 560                     | 6.9 |
| IB 3.2         | 450                       | 48                    | 1-2                       | 29                           | 1.5                     | 440                     | 7.8 |
| IB 3.3         | 450                       | 48                    | 1-2                       | 19                           | 2.6                     | 300                     | 7.4 |
| Untreated OB   | -                         | -                     | -                         | 1.1                          | < 0.72                  | 1,200                   | 11  |
| OB 1           | 300                       | 0.5                   | 2                         | 4.4                          | < 0.72                  | 940                     | 9.8 |
| OB 2           | 300                       | 0.5                   | 2                         | 3.6                          | < 0.72                  | 950                     | 10  |
| OB 3           | 300                       | 0.5                   | 2                         | 3.3                          | < 0.72                  | 840                     | 10  |
| OB 1.1         | 450                       | 12                    | 1-2                       | 42                           | < 0.72                  | 560                     | 8.9 |
| OB 1.2         | 450                       | 12                    | 1-2                       | 26                           | < 0.72                  | 540                     | 8.9 |
| OB 1.3         | 450                       | 12                    | 1-2                       | 22                           | 0.73                    | 720                     | 9.0 |
| OB 2.1         | 450                       | 24                    | 1-2                       | 37                           | 1.1                     | 500                     | 8.7 |
| OB 2.2         | 450                       | 24                    | 1-2                       | 140                          | 0.93                    | 590                     | 8.5 |
| OB 2.3         | 450                       | 24                    | 1-2                       | 90                           | < 0.72                  | 520                     | 8.7 |
| OB 3.1         | 450                       | 48                    | 1-2                       | 59                           | < 0.72                  | 370                     | 8.5 |
| OB 3.2         | 450                       | 48                    | 1-2                       | 69                           | 1.1                     | 380                     | 8.4 |
| OB 3.3         | 450                       | 48                    | 1-2                       | 62                           | 1.0                     | 420                     | 8.5 |

IB: Idaho biochar; OB: Oregon biochar.

**Table S2. Water results before and after 0.5 hr treatment with IB and OB**

| Water Sample | Nitrate (mg/L) | Total Phosphorus (mg/L) |
|--------------|----------------|-------------------------|
| BT #1        | 2.26           | 0.15                    |
| BT #2        | 2.34           | 0.14                    |
| AT IB #1     | 2.36           | 0.14                    |
| AT IB #2     | 2.25           | 0.15                    |
| AT IB #3     | 2.35           | 0.15                    |
| AT OB #1     | 2.31           | 0.85                    |
| AT OB #2     | 2.34           | 0.41                    |
| AT OB #3     | 2.33           | 0.75                    |

BT: before treatment; AT: after treatment; IB: Idaho biochar; OB: Oregon biochar.
